# Supplementary material
Source: Elsevier journal article supplement (https://www.sciencedirect.com/science/article/pii/S0104001420301597)

**Supplementary Material**

**Figure S2** A, Correlation between composite Z scores on postoperative 7th day and duration of anesthesia. B, Correlation between composite Z scores on postoperative 7th day and duration of Trendelenburg.


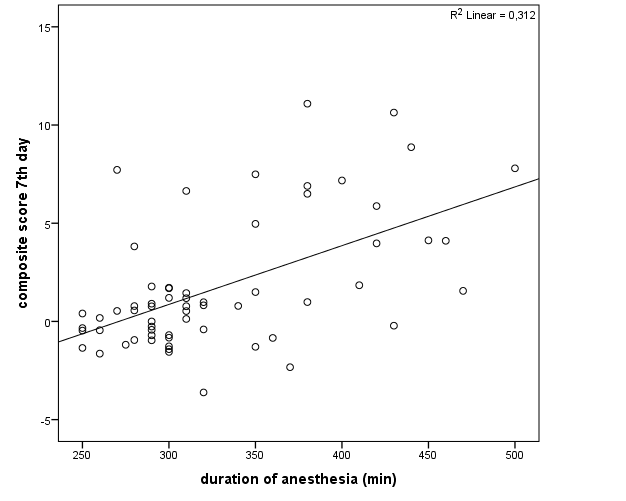


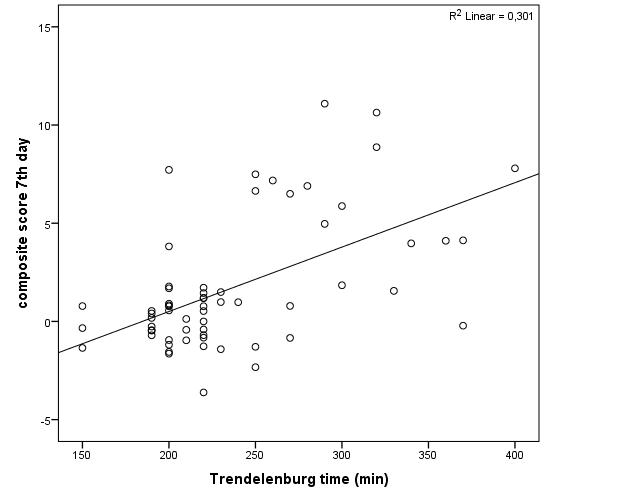


**Figure S3** A, ROC curves of S100B for patients with POCD on postoperative 7th day. B, ROC curves of S100B for patients with POCD on postoperative 3rd month.


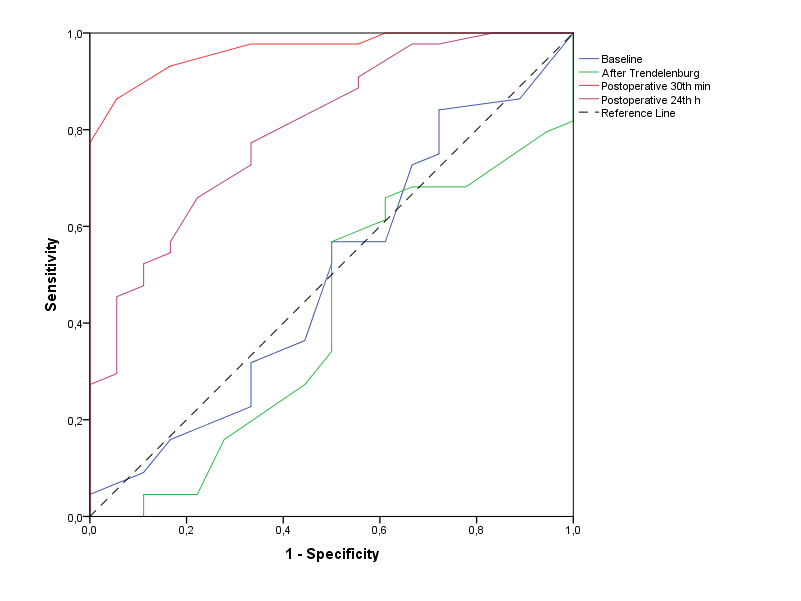


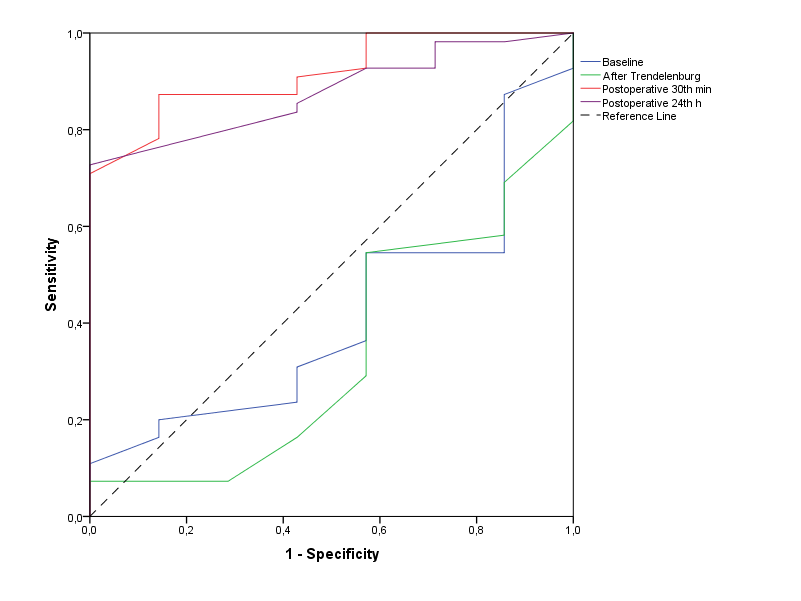

Supplement: mmc1 [file S0104001420301597:mmc1.docx]
